# Supplementary material for: Increasing Role of Targeted Immunotherapies in the Treatment of AML
Source: MDPI journal article supplement (doi:10.3390/ijms23063304), 2022-03-18
Supplement: s1 [file s1]

| Treatment of AML          |                                                                                             |                                                                                                                                             |                                                                                                                          |                             |                        |                                                                                                          |
|---------------------------|---------------------------------------------------------------------------------------------|---------------------------------------------------------------------------------------------------------------------------------------------|--------------------------------------------------------------------------------------------------------------------------|-----------------------------|------------------------|----------------------------------------------------------------------------------------------------------|
| Target sturcture          | drug/procedure                                                                              | advantage                                                                                                                                   | disadvantage                                                                                                             | clinical trials             | status                 | NCT/EudraCT/ISRCTN/Reference                                                                             |
| BCL-2                     | Venetoclax in combination with azacitidine                                                  | Feasible for patients with comorbidites and poor performance status                                                                         | Adverse events of grade $\geq 3$ ; thrombocytopenia, neutropenia and febrile neutropenia                                 | Phase III                   | Active, not recruiting | VIALE-A; NCT02993523; DiNardo et al. N Engl J Med, 2020                                                  |
| CD123                     | CART123 cells; cyclophosphamide; fludarabine                                                | In relapsed/refractory AML; activity of CART demonstrated by the CRS;                                                                       | Not yet standard therapy for AML; no significant clinical response; transient CAR T cell detection in vivo               | Phase I                     | Active, not recruiting | NCT03766126; Isidori et al. Front Oncol, 2021                                                            |
| CD123                     | Tagraxofusp-erzs (SL-401)                                                                   | In relapsed/refractory CD123+ AML or Blastic Plasmacytoid Dendritic Cell Neoplasm Immunophenotype-like (BPDCN-IPh-like) AML                 | Ongoing trial; no results published                                                                                      | Phase II                    | Recruiting             | NCT04342962                                                                                              |
| CD33                      | Gemtuzumab-Ozogamicin in combination with standard chemotherapy                             | Untreated de novo AML; improved outcome                                                                                                     | Persistent thrombocytopenia                                                                                              | Phase III                   | Completed              | EudraCT 2007-002933-36; Castaigne et al. Lancet, 2012                                                    |
| CD33                      | Gemtuzumab-Ozogamicin in combination with standard chemotherapy                             | NPM1-mutated AML; significantly fewer relapses occurred in the GO compared with the standard arm                                            | EFS was not met, mainly as a result of higher early death rate in the GO arm                                             | Phase III                   | Completed              | AMLSG 09-09; NCT00893399; Schlenk et al. J Clin Oncol, 2020                                              |
| CD47                      | Magrolimab in combination with azacitidine and venetoclax                                   | In relapsed/refractory AML; high CR/CRi (94%) rates                                                                                         | Anemia should be monitored                                                                                               | Phase Ib/II                 | Recruiting             | NCT04435691; Dayer et al. ASH, 2021                                                                      |
| CD70                      | Cusatuzumab (ARGX-110) in combination with azacitidine                                      | Treatment reduced LSCs and triggered gene signatures related to myeloid differentiation and apoptosis                                       | Rare infusion-related reactions; hematological toxicities related to azacitidine                                         | Phase I/II                  | Active, not recruiting | NCT03030612; Riether et al. Nat Med, 2020                                                                |
| CLEC12A/CLL1              | MCLA-117 bispecific antibody                                                                | In relapsed/refractory AML and newly diagnosed untreated AML patients with high risk cytogenetics; high expression in AML/not in normal HSC | The exact physiological function of CLL-1 is not understood yet; may lead to autoimmune diseases; trial is still ongoing | Phase I                     | Active, not recruiting | NCT03038230; Ma et al. Journal of Hematology & Oncology, 2019                                            |
| DNA methyltransferase     | Oral azacitidine (cc-486) maintenance                                                       | Significantly improved overall and relapse-free survival in patients with AML in remission after chemotherapy                               | Controllable side effects were mainly gastrointestinal adverse events and neutropenia                                    | Phase III                   | Active, not recruiting | NCT01757535; Wei et al. N Engl J Med, 2020                                                               |
| Exportin1 (XPO1)          | Selinexor (KPT-330)                                                                         | Patients $\geq 60$ years with relapsed/refractory AML                                                                                       | Increased incidence of adverse events $\geq 3$ (thrombocytopenia, febrile neutropenia, anemia, hyponatremia)             | Phase II                    | Completed              | NCT02088541; Sweet et al. Leuk Lymphoma, 2021                                                            |
| FLT3                      | Midostaurin in combination with standard chemotherapy                                       | Addition of midostaurin significantly improved overall (P=0.009) and event-free survival (P=0.002)                                          | The rate of grade $\geq 3$ anemia was higher in the midostaurin group (P=0.03), as was the rate of rash (P=0.008)        | Phase III                   | Active, not recruiting | NCT00651261; CALGB 10603 (RATIFY); Stone et al. N Engl J Med, 2017                                       |
| FLT3                      | 4G8-SDIEM (Fc-optimized antibody FLYSYN) monotherapy                                        | Safe and well tolerated in patients with molecular MRD                                                                                      | Unspecific adverse events (fatigue, flu like symptoms, musculoskeletal symptoms and laboratory abnormalities)            | Phase I/II                  | Completed              | NCT02789254; Heitmann et al. Blood, 2020                                                                 |
| Hedgehog pathway          | Glasdegib in combination with azacitidine or standard chemotherapy                          | Significant antitumor efficacy in vivo and clinical activity in Phase I and Ib/II trials in patients with untreated AML                     | Side effects like alopecia, muscle spasms and dysgeusia                                                                  | Phase III                   | Completed              | NCT03416179; BRIGHT AML 1019; Cortes et al. Future Oncol, 2019                                           |
| Histon-Deacetylase (HDAC) | Azacitidine in combination with vorinostat                                                  | There was significant antileukemia activity and vorinostat effectively inhibited HDAC activity in peripheral blood and bone marrow blasts   | Dose-limiting toxicities included anorexia, dehydration, diarrhea, and fatigue                                           | Phase II                    | Completed              | NCT01617226; RA-V-A; Garcia-Manero et al. Blood, 2008                                                    |
| IDH-2                     | Azacitidine in combination with enasidenib                                                  | Well-tolerated and effective in elderly pts with IDH-2mut untreated AML as well as pts with refractory/relapsed AML                         | Adverse events were IDH differentiation syndrome (8%) and indirect hyperbilirubinemia (35%)                              | Phase II                    | Unknown                | NCT03683433; Venugopal et al. Blood Cancer J, 2022                                                       |
| MAGE                      | NPM1-peptide vaccine against NY-ESO-1, PRAME, MAGE-A3, WT-1 in combination with azacitidine | Five high risk MDS patients were treated; no serious adverse events                                                                         | The trial was terminated early as there was no sign of clinical benefit or immunological response                        | Phase I                     | Completed              | NCT02750995; Holmber-Thyden et al. ASH, 2020                                                             |
| Menin-MLL (KMT2A)         | KO-539                                                                                      | Orally administered; in relapsed/refractory AML                                                                                             | Further data is needed                                                                                                   | Phase I/II                  | Recruiting             | NCT04067336; KOMET-001; Wang et al. ASH, 2020                                                            |
| Menin-MLL (KMT2A)         | SNDX-5613                                                                                   | Orally administered; in relapsed/refractory leukemia                                                                                        | Adverse events were QT prolongation, anemia, and differentiation syndrome                                                | Phase I/II                  | Recruiting             | NCT04065399; AUGMENT-101; Tucker et al. Targeted Oncology, 2021                                          |
| PRAME/WT1/Cyclin A1       | Infusion of NEXI-001 T Cells after alloHCT                                                  | Enhance GvL effect without increasing the incidence of GvHD, cytokine release syndrome or neurotoxicity                                     | Donor-derived adoptive cellular therapy product. Time mangement, donor consent and production limitations                | Phase I/II                  | Recruiting             | NCT04284228; Malki et al. ASCO, 2021                                                                     |
| Proteinase 3/PR1          | PR1 leukemia peptide vaccine in combination with Montanide ISA-51                           | Reduction of disease activity in 22% (12/53) in patient with CML, AML or MDS                                                                | Not feasible in patients with high leukemic burden; Vaccine HLA-A2 restricted                                            | Phase I/II                  | Completed              | NCT00004918; Qazilbash et al. Leukemia, 2017                                                             |
| RHAMM                     | 1. RHAMM-R3 vaccine<br>2. High-dose RHAMM-R3 vaccine                                        | Increase of R3-specific CD8+ T cells and reduction of blasts in bone marrow                                                                 | Not feasible in patients with high leukemic burden; Not only AML patients recruited; Vaccine HLA-A2 restricted           | Phase I/II                  | Completed              | ISRCTN32763606 and EudraCT as 2005-001706-37; Schmitt et al. Blood, 2008; Greiner et al. Haematol., 2010 |
| SSX2IP                    | Up to date there is no drug available                                                       | SSX2IP expression at disease presentation predicts good survival with no detectable cytogenetic rearrangements                              |                                                                                                                          | No clinical trial available |                        | Davis et al. Cancers (Basel), 2020                                                                       |
| Survivin                  | YM155 survivin suppressant                                                                  | To cancer biologists, survivin is one of the most tumour-specific molecules                                                                 | Further research is needed                                                                                               | No clinical trial available |                        | Nakahara et al. Cancer res, 2007                                                                         |
| TP53                      | stores wild-type p53 functions in TP53-mutant cells                                         | In combination with azacitidine as maintenance therapy after alloHCT                                                                        | Elderly and patients with renal failure may be vulnerable for transient neurologic side effects                          | Phase II                    | Completed              | NCT03931291; Sallman et al. Journal of Clinical Oncology, 2021                                           |
| WT-1                      | WT1 126-134 peptide vaccine                                                                 | WT1-expressing AML/ MDS without curative treatment option                                                                                   | Low patient number; Vaccine HLA-A2 restricted                                                                            | Unknown                     | Unknown                | NCT unknow; Keilholz et al. Blood, 2009                                                                  |
| WT-1                      | WT1 peptide vaccine (galinpepimut-S)                                                        | Stimulation of a specific immune response, and survival in excess of 5 years                                                                | Clinical efficacy needs to be addressed in a larger trial with more homogeneous patient population                       | Phase II                    | Completed              | NCT01266083; Maslak et al. Blood Adv., 2018                                                              |
| WT-1                      | WT1 mRNA-electroporated Dendritic Cell Vaccination                                          | WT1-targeted DC vaccination can elicit anti-leukemia T cell immunity in patients with AML at very high risk of relapse                      | Not feasible in patients with high leukemic burden; Not only AML patients recruited;                                     | Phase II                    | Unknown                | NCT00965224; Anguille et al. Blood, 2017                                                                 |
